# Supplementary material
Source: ML conference proceedings conference paper supplement (https://proceedings.neurips.cc/paper_files/paper/2015/hash/fccb60fb512d13df5083790d64c4d5dd-Abstract.html)
Supplement: Supplementary file [file fccb60fb512d13df5083790d64c4d5dd-Supplemental.zip]

---

# Supplementary Material

---

## Gunwoong Park

Department of Statistics  
University of Wisconsin-Madison  
Madison, WI 53706  
parkg@stat.wisc.edu

## Garvesh Raskutti

Department of Statistics  
Department of Computer Science  
Wisconsin Institute for Discovery, Optimization Group  
University of Wisconsin-Madison  
Madison, WI 53706  
raskutti@cs.wisc.edu

### 1 Proof of Theorem 3.1

*Proof.* We prove it by induction that requires  $p$  steps to find a causal ordering that is consistent with the DAG. Without loss of generality, assume that one of the true causal ordering  $\pi^*$  is  $\{1, 2, \dots, p\}$ . For ease of notation, let  $\mathcal{F}_s = \{X_1, X_2, \dots, X_s\}$ . Let  $k = 1$  be the first step:

$$\text{Var}(X_j) = \mathbb{E}(\text{Var}[X_j|\mathcal{F}_{j-1}]) + \text{Var}(\mathbb{E}[X_j|\mathcal{F}_{j-1}]),$$

where the outer expectation and variance is taken over  $X_1, X_2, \dots, X_{j-1}$ . Since the conditional distribution  $X_j|\mathcal{F}_{j-1} \sim \text{Poisson}(g_j(X_{\text{Pa}(j)}))$ , we have  $\text{Var}[X_j|\mathcal{F}_{j-1}] = \mathbb{E}[X_j|\mathcal{F}_{j-1}] = g_j(X_{\text{Pa}(j)})$ . Hence,

$$\begin{aligned} \text{Var}(X_j) &= \mathbb{E}(\mathbb{E}[X_j|\mathcal{F}_{j-1}]) + \text{Var}(g_j(X_{\text{Pa}(j)})) \\ &= \mathbb{E}(X_j) + \text{Var}(g_j(X_{\text{Pa}(j)})), \end{aligned}$$

yielding that

$$\text{Var}(X_j) - \mathbb{E}(X_j) = \text{Var}(g_j(X_{\text{Pa}(j)})).$$

Clearly, if  $\text{Pa}(j)$  is empty, meaning the node is the first component of the causal ordering,  $\text{Var}(g_j(X_{\text{Pa}(j)})) = 0$ . Otherwise,  $\text{Var}(g_j(X_{\text{Pa}(j)})) > 0$  by the assumption. Hence for any node that can not be the first in the ordering,  $\text{Var}(X_j) - \mathbb{E}(X_j) > 0$ . Hence we pick any node  $X_k$  such that  $\text{Var}(X_k) - \mathbb{E}(X_k) = 0$  as being the first element of the causal ordering and  $X_1$  satisfies the above equation.

For  $k = m$ , assume  $X_1, X_2, \dots, X_m$  is a valid causal ordering for the first  $m$  nodes. Now we consider

$$\text{Var}(X_j|\mathcal{F}_m) = \mathbb{E}(\text{Var}[X_j|\mathcal{F}_{j-1}|\mathcal{F}_m]) + \text{Var}(\mathbb{E}[X_j|\mathcal{F}_{j-1}|\mathcal{F}_m]),$$

for  $j = m+1, m+2, \dots, p$ , where the expectation and variance are taken over the variables  $X_1, X_2, \dots, X_m$ . Again, for any  $j = m+1, m+2, \dots, p$ , we have  $\text{Var}[X_j|\mathcal{F}_{j-1}] = \mathbb{E}[X_j|\mathcal{F}_{j-1}] = g_j(X_{\text{Pa}(j)})$ . Further, since  $X_1, X_2, \dots, X_m$  is a valid causal ordering for the first  $m$  nodes,

$$\begin{aligned} \text{Var}(X_j|\mathcal{F}_m) &= \mathbb{E}(\mathbb{E}[X_j|\mathcal{F}_{j-1}|\mathcal{F}_m]) + \text{Var}(\mathbb{E}[X_j|\mathcal{F}_{j-1}|\mathcal{F}_m]) \\ &= \mathbb{E}(X_j|\mathcal{F}_m) + \text{Var}(g_j(X_{\text{Pa}(j)})|\mathcal{F}_m). \end{aligned}$$

Hence, following on similar lines,

$$\text{Var}(X_j|\mathcal{F}_m) - \mathbb{E}(X_j|\mathcal{F}_m) = \text{Var}[g_j(X_{\text{Pa}(j)})|\mathcal{F}_m].$$

Hence if  $\text{Pa}(j) \setminus \{1, 2, \dots, m\}$  is empty,  $\text{Var}(g_j(X_{\text{Pa}(j)})|\mathcal{F}_m) = 0$  and  $\text{Var}(X_j|\mathcal{F}_m) - \mathbb{E}(X_j|\mathcal{F}_m) = 0$ . Any such node can be next on the causal ordering and  $X_m$  holds the above property. On the other hand, for any node in which  $\text{Pa}(j) \setminus \{1, 2, \dots, m\}$  is non-empty  $\text{Var}(X_j|\mathcal{F}_m) - \mathbb{E}(X_j|\mathcal{F}_m) > 0$  which excludes it from being next in the causal ordering. Hence  $X_1, X_2, \dots, X_{m+1}$  is a valid causal ordering for the first  $m+1$  nodes. This completes the proof by induction.  $\square$

## 2 Proof of Theorem 4.2

*Proof.* Let  $X^{(i)} = (X_1^{(i)}, \dots, X_p^{(i)})$  be the i.i.d  $n$  samples from the given DAG model. Let  $\pi^*$  be a true causal ordering and  $\hat{\pi}$  be the estimated causal ordering. Without loss of generality, assume that the true causal ordering  $\pi^*$  is  $\{1, 2, \dots, p\}$ . For an arbitrary permutation or causal ordering  $\pi$ , let  $\pi_j$  represent its  $j^{\text{th}}$  element.

Let  $E_u$  denote the set of undirected edges corresponding to the *moralized* graph (i.e. the directed edges without directions and edges between nodes with common children). Recall the definitions  $\mathcal{N}(j) := \{k \in \{1, 2, \dots, p\} \mid (j, k) \in E_u\}$  denote the neighborhood set of  $j$  in the moralized graph and  $K(j) = \{k \mid k \in \mathcal{N}(j-1) \cap \{j, \dots, p\}\}$  denote a candidate set for  $\pi_j$  and  $C_{jk} = \mathcal{N}(k) \cap \{\pi_1, \pi_2, \dots, \pi_{j-1}\}$  which is the intersection of the neighbors of  $k$  with  $\{1, 2, \dots, j-1\}$ .

Recall that for ease of notation for any  $j \in \{1, 2, \dots, p\}$ , and  $S \subset \{1, 2, \dots, p\}$  let  $\mu_{j|S}$  and represent  $\mathbb{E}[X_j|X_S]$  and  $\sigma_{j|S}^2 = \text{Var}(X_j|X_S)$ . Also, denote  $\mu_{j|S}(x_S)$  and represent  $\mathbb{E}[X_j|X_S = x_S]$  and  $\sigma_{j|S}^2(x_S) = \text{Var}(X_j|X_S = x_S)$ . Let  $n_S(x_S) = \sum_{i=1}^n \mathbf{1}(X_S^{(i)} = x_S)$  and  $n_S = \sum_{x_S} n(x_S) \mathbf{1}(n(x_S) \geq c_0 \cdot n)$  for an arbitrary  $c_0 \in (0, 1)$ .

The overdispersion score of  $k \in K(j)$  for the  $j^{\text{th}}$  component of the causal ordering, defined in the second step of our ODS algorithm only considers elements of  $\mathcal{X}(\hat{C}_{jk}) = \{x \in \{X_{\hat{C}_{jk}}^{(1)}, X_{\hat{C}_{jk}}^{(2)}, \dots, X_{\hat{C}_{jk}}^{(n)}\} \mid n(x) \geq c_0 \cdot n\}$  so we only count up elements that occur sufficiently frequently.

According to the ODS algorithm, the truncated sample conditional expectation and variance of  $X_j$  given  $X_S = x$  for  $j \in \{1, 2, \dots, p\}$  and any subset  $S \subset \{1, 2, \dots, p\} \setminus \{j\}$  be following: for  $x \in \mathcal{X}(S)$ ,

$$\begin{aligned}\hat{\mu}_{j|S}(x) &= \frac{1}{n_S(x)} \sum_{i=1}^n X_j^{(i)} \mathbf{1}(X_S^{(i)} = x) \\ \hat{\sigma}_{j|S}^2(x) &= \frac{1}{n_S(x) - 1} \sum_{i=1}^n (X_j^{(i)} - \hat{\mu}_{j|S}(x))^2 \mathbf{1}(X_S^{(i)} = x)\end{aligned}$$

The overdispersion score of  $k \in K(j)$  for the  $j^{\text{th}}$  element of the causal ordering is for  $x \in \mathcal{X}(C_{jk})$ ,

$$\begin{aligned}\hat{s}_{jk}(x) &= \hat{\sigma}_{k|\hat{C}_{jk}}^2(x) - \hat{\mu}_{k|\hat{C}_{jk}}(x) \\ \hat{s}_{jk} &= \hat{\mathbb{E}}_{\hat{C}_{jk}}(\hat{s}_{jk}(x)) = \sum_{x \in \mathcal{X}(jk)} \frac{n_{\hat{C}_{jk}}(x)}{n_{\hat{C}_{jk}}} \hat{s}_{jk}(x).\end{aligned}$$

And the correct overdispersion score is

$$s_{jk}^* = \mathbb{E}_{C_{jk}}[\sigma_{k|C_{jk}}^2 - \mu_{k|C_{jk}}] = \mathbb{E}_{C_{jk}}[\text{Var}(g_k(\text{Pa}(k))|C_{jk})].$$

Let us define some events for the proof and  $d$  denote the maximum degree of the moralized graph. For any  $j \in \{1, 2, \dots, p\}$  and  $k \in K(j)$ ,

$$\begin{aligned}\xi_1 &= \{\max_{j,k} |\hat{s}_{jk} - s_{jk}^*| < m/2\} \\ \xi_2 &= \{\max_k \max_{i=1, \dots, n} X_k^{(i)} < n^{\frac{1}{5+d}}\}\end{aligned}$$

We prove it by induction that requires  $p$  steps to recover a causal ordering that is consistent with the Poisson DAG. Without loss of generality, assume that the true causal ordering  $\pi^*$  is  $\{1, 2, \dots, p\}$ . For the first step  $j = 1$ , a set of candidate element of  $\pi_1$  is  $K(1) = \{1, 2, \dots, p\}$  and a candidate parent set of each node  $C_{1k} = \emptyset$  for all  $k \in K(1)$ .

$$\begin{aligned}P(\hat{\pi}_1 \neq \pi_1^*) &= P(\text{exists at least one } k \in K(1) \setminus \{1\} \text{ s.t. } \hat{s}_{11} > \hat{s}_{1k}) \\ &\leq |K(1)| \max_{k \in K(1) \setminus \{1\}} \{P(s_{11}^* + \frac{m}{2} > s_{1k}^* - \frac{m}{2} | \xi_1) + P(\xi_1^c | \xi_2) + P(\xi_2^c)\} \\ &\leq p \max_{k \in K(1) \setminus \{1\}} \{P(m > s_{1k}^* | \xi_1) + P(\xi_1^c | \xi_2) + P(\xi_2^c)\}\end{aligned}$$

By Assumption (A1),  $s_{1k}^* > m$  and we will represent some Propositions that respectively control  $P(\xi_1^c|\xi_2)$  and  $P(\xi_2^c)$ .

For the  $j - 1$  step, assume  $(\hat{\pi}_1, \hat{\pi}_2, \dots, \hat{\pi}_{j-1})$  is a valid ordering for the first  $j - 1$  nodes. Note that with the correct  $\mathcal{N}(j)$ ,  $\hat{C}_{jk} = C_{jk}$ . Now, we consider  $\pi_j^*$ . The probability of a false recovery of  $\pi_j^*$  given the true undirected edges of the moralized graph and the true causal ordering before  $j$  is following:

$$\begin{aligned} & P(\hat{\pi}_j \neq \pi_j^* | \hat{\pi}_1 = \pi_1^*, \dots, \hat{\pi}_{j-1} = \pi_{j-1}^*) \\ &= P(\text{exists at least one } k \in K(j) \setminus \{j\} \text{ s.t. } \hat{s}_{jj} > \hat{s}_{jk}) \\ &\leq |K(j)| \max_{k \in K(j) \setminus \{j\}} \{P(\hat{s}_{jj} + m/2 > s_{jk}^* - m/2 | \xi_1) + P(\xi_1^c | \xi_2) + P(\xi_2^c)\} \\ &\leq |K(j)| \max_{k \in K(j) \setminus \{j\}} \{P(m > s_{jk}^* | \xi_1) + P(\xi_1^c | \xi_2) + P(\xi_2^c)\} \end{aligned}$$

By Assumption (A1),  $s_{jk}^* > m$  and we represent some Propositions that respectively control  $P(\xi_1^c|\xi_2)$  and  $P(\xi_2^c)$ . Furthermore we also show a condition on  $c_0$ .

**Proposition 2.1.** *For all  $j \in \{1, 2, \dots, p\}$ ,  $k \in K(j)$ ,  $c_0 \leq n^{-\frac{d}{5+d}}$  given  $\xi_2$  is a sufficient that a candidate parents set  $\mathcal{X}(C_{jk})$  is not empty*

**Proposition 2.2.**

$$P(\xi_1^c | \xi_2) \leq 2p^2 n^{\frac{d}{5+d}} \left\{ \exp\left(-\frac{m^2 n^{1/(5+d)}}{18}\right) + \exp\left(-\frac{m^2 n^{1/(5+d)}}{9}\right) + \exp\left(-\frac{m^2 n^{3/(5+d)}}{9}\right) \right\},$$

where  $m$  is the constant in Assumption (A1).

**Proposition 2.3.**

$$P(\xi_2^c) \leq np M \exp(-n^{1/(5+d)} \log 2)$$

where  $M$  is the constant in Assumption (A2).

Hence for any  $j \in \{1, 2, \dots, p\}$  with  $c_0 = n^{-\frac{d}{5+d}}$ ,

$$\begin{aligned} & P(\hat{\pi}_j \neq \pi_j^* | \hat{\pi}_1 = \pi_1^*, \dots, \hat{\pi}_{j-1} = \pi_{j-1}^*) \\ &\leq p \max_{k \in K(j) \setminus \{j\}} \{P(m > s_{jk}^* | \xi_1) + P(\xi_1^c | \xi_2) + P(\xi_2^c)\} \\ &\leq 2p^3 n^{\frac{d}{5+d}} \left\{ \exp\left(-\frac{m^2 n^{1/(5+d)}}{18}\right) + \exp\left(-\frac{m^2 n^{1/(5+d)}}{9}\right) + \exp\left(-\frac{m^2 n^{3/(5+d)}}{9}\right) \right\} \\ &\quad + np^2 M \exp(-n^{1/(5+d)} \log 2) \end{aligned} \tag{1}$$

By using the above probability bound (1),

$$\begin{aligned} P(\hat{\pi} \neq \pi^*) &\stackrel{(E_1)}{\leq} P(\hat{\pi}_1 \neq \pi_1^*) + \dots + P(\hat{\pi}_{p-1} \neq \pi_{p-1}^* | \hat{\pi}_1 = \pi_1^*, \dots, \hat{\pi}_{p-2} = \pi_{p-2}^*) \\ &\stackrel{(E_2)}{\leq} 2p^4 n^{\frac{d}{5+d}} \left\{ \exp\left(-\frac{m^2 n^{1/(5+d)}}{18}\right) + \exp\left(-\frac{m^2 n^{1/(5+d)}}{9}\right) + \exp\left(-\frac{m^2 n^{3/(5+d)}}{9}\right) \right\} \\ &\quad + np^3 M \exp(-n^{1/(5+d)} \log 2) \end{aligned}$$

The first inequality  $(E_1)$  is followed from  $P(A \cup B) = P(A) + P(B \cap A^c) = P(A) + P(B|A^c)P(A^c) \leq P(A) + P(B|A^c)$  for some events  $A, B$ . And  $(E_2)$  is directly from (1).

Hence, there exists some positive constants  $C_1, C_2, C_3 > 0$  such that

$$P(\hat{\pi} \neq \pi^*) \leq C_1 \exp(-C_2 n^{1/(5+d)}) + C_3 \log \max\{p, n\}$$

□

### 2.0.1 Proof of Proposition 2.1

*Proof.* Let  $|X_S|$  denote the cardinality of a set  $\{X_S^{(1)}, X_S^{(2)}, \dots, X_S^{(n)}\}$  and  $|\mathcal{X}(S)|$  denote the cardinality of a set  $\mathcal{X}(S)$ . In worst case where  $|\mathcal{X}(S)| = 1$ , for all  $x \in \{X_S^{(1)}, X_S^{(2)}, \dots, X_S^{(n)}\}$ ,  $n_S(x) = c_0.n - 1$  except for only one component  $y \in \mathcal{X}(S)$ . In this case, the sample size  $n = n_S(y) + (|X_S| - 1)(c_0.n - 1)$ . A simple calculation yields that

$$n_S(y) = n - (|X_S| - 1)(c_0.n - 1) = n - c_0.n|X_S| + c_0.n + |X_S| - 1.$$

Hence  $c_0.n \leq n_S(y)$  is equivalent to  $c_0 \leq \frac{n+|X_S|-1}{n|X_S|}$ . Since  $\frac{1}{|X_S|} \leq \frac{n+|X_S|-1}{n|X_S|}$ , if  $c_0 \leq \frac{1}{|X_S|}$  there exists at least one component  $y \in \mathcal{X}(S)$ . In addition under the event  $\xi_2$ ,  $|X_S| \leq n^{\frac{d}{5+d}}$  which is all possible combinations. Hence if  $c_0 \leq n^{-\frac{d}{5+d}}$ ,  $|\mathcal{X}(S)| \neq 0$ .  $\square$

### 2.0.2 Proof of Proposition 2.2

*Proof.* This problem is reduced to the consistency rate of a sample conditional mean and conditional variance. For ease of notation, let  $n_{jk} = n_{C_{jk}}$  and  $n_{jk}(x) = n_{C_{jk}}(x)$ . Suppose that  $c_0 = n^{-\frac{d}{5+d}}$ . Then for any  $j \in \{1, 2, \dots, p\}$  and  $k \in K(j)$ ,

$$\begin{aligned} P(\xi_1^c | \xi_2) &\leq p^2 \max_{j,k} P(|\hat{s}_{jk} - s_{jk}^*| > \frac{m}{2} | \xi_2) \\ &\leq p^2 \max_{j,k} P\left(\sum_{x \in \mathcal{X}(C_{jk})} \frac{n_{jk}(x)}{n_{jk}} |\hat{s}_{jk}(x) - s_{jk}^*(x)| > \frac{m}{2} | \xi_2\right) \\ &\stackrel{(E_1)}{\leq} p^2 \max_{j,k} \sum_{x \in \mathcal{X}(C_{jk})} P(|\hat{s}_{jk}(x) - s_{jk}^*(x)| > \frac{m}{2} \frac{n_{jk}}{n_{jk}(x)} | \xi_2) \\ &\stackrel{(E_2)}{\leq} p^2 \max_{j,k} |\mathcal{X}(C_{jk})| \max_{x \in \mathcal{X}(C_{jk})} P(|\hat{s}_{jk}(x) - s_{jk}^*(x)| > \frac{m}{2} | \xi_2) \\ &\stackrel{(E_3)}{\leq} p^2 n^{\frac{d}{5+d}} \max_{j,k,x} P(|(\hat{\sigma}_k^2|_{C_{jk}}(x) - \hat{\mu}_k|_{C_{jk}}(x)) - (\sigma_k^2|_{C_{jk}}(x) - \mu_k|_{C_{jk}}(x))| > \frac{m}{2} | \xi_2) \\ &\leq p^2 n^{\frac{d}{5+d}} \max_{j,k,x} \left\{ P(|\hat{\sigma}_k^2|_{C_{jk}}(x) - \sigma_k^2|_{C_{jk}}(x)| > \frac{m}{3} | \xi_2) + P(|\hat{\mu}_k|_{C_{jk}}(x) - \mu_k|_{C_{jk}}(x)| > \frac{m}{6} | \xi_2) \right\} \\ &\stackrel{(E_4)}{\leq} 2p^2 n^{\frac{d}{5+d}} \max_{j,k,x} \left\{ \exp\left(-\frac{m^2 n_{jk}(x)}{18 n^{4/(5+d)}}\right) + \exp\left(-\frac{m^2 n_{jk}(x)}{9 n^{4/(5+d)}}\right) + \exp\left(-\frac{m^2 n_{jk}(x)}{9 n^{2/(5+d)}}\right) \right\} \\ &\stackrel{(E_5)}{\leq} 2p^2 n^{\frac{d}{5+d}} \max_{j,k,x} \left\{ \exp\left(-\frac{m^2 n^{1/(5+d)}}{18}\right) + \exp\left(-\frac{m^2 n^{1/(5+d)}}{9}\right) + \exp\left(-\frac{m^2 n^{3/(5+d)}}{9}\right) \right\} \\ &= 2p^2 n^{\frac{d}{5+d}} \left\{ \exp\left(-\frac{m^2 n^{1/(5+d)}}{18}\right) + \exp\left(-\frac{m^2 n^{1/(5+d)}}{9}\right) + \exp\left(-\frac{m^2 n^{3/(5+d)}}{9}\right) \right\}. \end{aligned}$$

$(E_1)$  is followed from that  $P(\sum_i \omega_i X_i > \delta) \leq \sum_i P(X_i > \delta/\omega_i)$ , and  $(E_2)$  is from  $\frac{n_{jk}(x)}{n_{jk}} < 1$ . Since  $n_{jk}(x) \geq c_0.n$  for all  $x \in \mathcal{X}(C_{jk})$ ,  $|\mathcal{X}(C_{jk})| \leq 1/c_0$  hence  $(E_3)$  and  $(E_5)$  hold. Moreover,  $(E_4)$  is followed from the Hoeffding's inequality (Theorem 2 [1]) since samples are independent and bounded above  $n^{1/(5+d)}$  given  $\xi_2$ .  $\square$

### 2.0.3 Proof of Proposition 2.3

*Proof.* For any  $j \in \{1, 2, \dots, p\}$ , the conditional distribution of  $X_j$  given  $X_{\text{pa}(j)}$  is Poisson with rate parameter  $g_j(\text{Pa}(j))$ . Hence for  $k \in K(j)$ ,

$$\begin{aligned}
P(\xi_2^c) &= P\left(\max_{k \in K(j)} \max_{i=1, \dots, n} X_k^{(i)} > n^{1/(5+d)}\right) \\
&\stackrel{(E_1)}{\leq} np \max_{k \in K(j)} \max_{i=1, \dots, n} P(|X_k^{(i)}| > n^{1/(5+d)}) \\
&\stackrel{(E_2)}{\leq} np \max_{k \in K(j)} \max_{i=1, \dots, n} \mathbb{E}_{\text{pa}(k)} \left[ \exp\left(-n^{1/(5+d)} \log 2 + g_k(\text{pa}(k))\right) \right] \\
&\stackrel{(E_3)}{\leq} np \max_{k \in K(j)} \max_{i=1, \dots, n} M \exp(-n^{1/(5+d)} \log 2) \\
&= np M \exp(-n^{1/(5+d)} \log 2).
\end{aligned}$$

$(E_1)$  is followed from the union bound and  $|K(j)| < p$ .  $(E_2)$  is from the moment generating function of Poisson distribution with  $t = \log 2$ . And,  $(E_3)$  is from Assumption (A2).  $\square$

### References

- [1] W. Hoeffding, "Probability inequalities for sums of bounded random variables," *Journal of the American statistical association*, vol. 58, no. 301, pp. 13–30, 1963.
